# Supplementary material for: Exquisitely regulated CeO2/Co(OH)2 electrocatalysts for enhanced oxygen evolution reaction
Source: Royal Society of Chemistry journal article supplement (doi:10.1039/d4nj00636d), 2024-01-01
Supplement: d4nj00636d1.pdf [file d4nj00636d1.pdf]

**Exquisite regulated CeO<sub>2</sub>/Co (OH)<sub>2</sub> electrocatalysts for enhanced oxygen  
evolution reaction**

Xiaowei Li,<sup>a1</sup> Quanquan Shi,<sup>a,b1\*</sup> Jingjia Li,<sup>a</sup> Chun Li,<sup>a</sup> Qingyi Qian<sup>a\*</sup>

<sup>a</sup>College of Science & College of Material Science and Art Design, Inner Mongolia Agricultural University, Hohhot 010018, China.

<sup>b</sup>Inner Mongolia Key Laboratory of Soil Quality and Nutrient Resource & Key Laboratory of Agricultural Ecological Security and Green Development at Universities of Inner Mongolia Autonomous, Hohhot 010018, China.

<sup>1</sup>X.L. and Q.S. contributed equally to this work.

\*Corresponding author. E-mail address: qqshi@imau.edu.cn (Q. Shi); \*\*\*

qyqian104346@163.com;

## 1. Synthesis methods

### 1.1 Synthesis of $\text{CeO}_2/\text{Co}(\text{OH})_2$ powder

A simple chemical disposition method was used to prepare  $\text{CeO}_2/\text{Co}(\text{OH})_2$  catalysts using solution with different pH values. 1.0 g  $\text{NH}_4\text{Cl}$  was dissolved into 200 ml deionized water. The pH value of the solution was adjusted to 8.5, 9, 9.5, 10, 10.5 and 11 by adding 5 mol / L NaOH solution, respectively. 1.0 g  $\text{Co}(\text{NO}_3)_2 \cdot 6\text{H}_2\text{O}$  and 0.1g  $\text{Ce}(\text{NO}_3)_3 \cdot 6\text{H}_2\text{O}$  were added into the above solution to gain hydroxide, and then the solution pH value was adjusted by NaOH solution again. Finally, it was precipitated for 24 hours at room temperature statically. Precipitation was achieved after washing the solution three times with deionized water and ethanol. After drying at 70 °C for 12 hours,  $\text{CeO}_2/\text{Co}(\text{OH})_2$  powder was gained by grinding the bulk sample. The samples prepared under different pH values were denoted by 8.5- $\text{CeO}_2/\text{Co}(\text{OH})_2$ , 9- $\text{CeO}_2/\text{Co}(\text{OH})_2$ , 9.5- $\text{CeO}_2/\text{Co}(\text{OH})_2$ , 10- $\text{CeO}_2/\text{Co}(\text{OH})_2$ , 10.5- $\text{CeO}_2/\text{Co}(\text{OH})_2$  and 11- $\text{CeO}_2/\text{Co}(\text{OH})_2$ , respectively. The preparation process is shown in Fig.1.

### 1.2 Synthesis of $\text{Co}(\text{OH})_2$ powder

The best pH value for preparing  $\text{CeO}_2/\text{Co}(\text{OH})_2$  sample was screened by electrochemical testing. Then, the same method was adopted to prepare  $\text{Co}(\text{OH})_2$  without Ce salt at this pH value. In brief, 1.0 g  $\text{NH}_4\text{Cl}$  was dissolved into 200 ml deionized water and NaOH solution was added to adjust the solution pH value to 9.5. Then, 1.0 g  $\text{Co}(\text{NO}_3)_2 \cdot 6\text{H}_2\text{O}$  was added into the above solution to gain hydroxide and then NaOH solution was used to adjust the solution pH value again. Finally, it was precipitated for 24 hours at room temperature statically. Precipitation was achieved after washing the solution three times with deionized water and ethanol. After drying at 70 °C for 12 hours,  $\text{Co}(\text{OH})_2$  powder was gained by grinding the bulk sample.

### 1.3 Preparation of the working electrodes

The above prepared  $\text{CeO}_2/\text{Co}(\text{OH})_2$  or  $\text{Co}(\text{OH})_2$  catalyst (10 mg) was dispersed in 900  $\mu\text{L}$  of ethanol and 100  $\mu\text{L}$  of 5% Nafion, and then sonicated for 30 min. 100  $\mu\text{L}$  catalyst ink was drop-casted on a carbon paper electrode area of 1 cm  $\times$  1 cm and dried at 70 °C.

### 1.4 Electrochemical tests

The OER activities were measured by a CHI 760D electrochemical workstation in a three electrodes method using sample as the working electrode, carbon bar as the counter electrode, and Ag/AgCl electrode as the reference electrode in 1 M KOH electrolytes. The OER activities were measured using the linear sweep voltammetry (LSV) technique. LSV curves were executed at the potential range between 0.3 to 1 V vs Ag/AgCl with a scan rate of 5 mV s<sup>-1</sup>. Measured potentials were converted and presented as a reversible hydrogen electrode (RHE) by the equation of  $E_{(RHE)} = E_{(Ag/AgCl)} + 0.197 \text{ V} + 0.059 \times \text{pH}$ . And then, the potentials were referenced by iR correction. The overpotential ( $\eta$ ) was calculated with the following equation:  $\eta = E_{(RHE)} - 1.23 \text{ V}$ . The electrochemical impedance spectroscopy (EIS) plots were collected at the potential of 0.5 V with a frequency range from 100 kHz to 0.01 Hz. Electrochemical surface area (ECSA) testing by cyclic voltammetry. Catalyst stability was determined using i-t curves at 20 mA cm<sup>-2</sup> process potential.

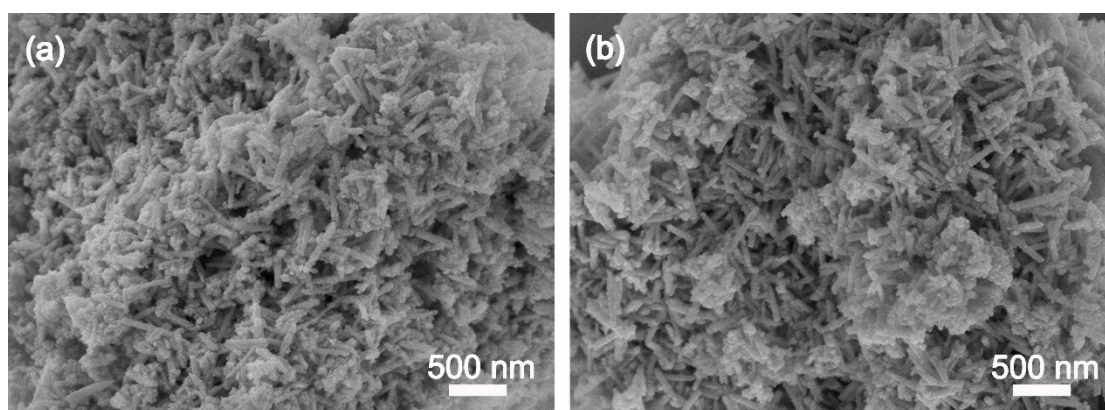

Fig. S1. Morphology characterizations of CeO<sub>2</sub>

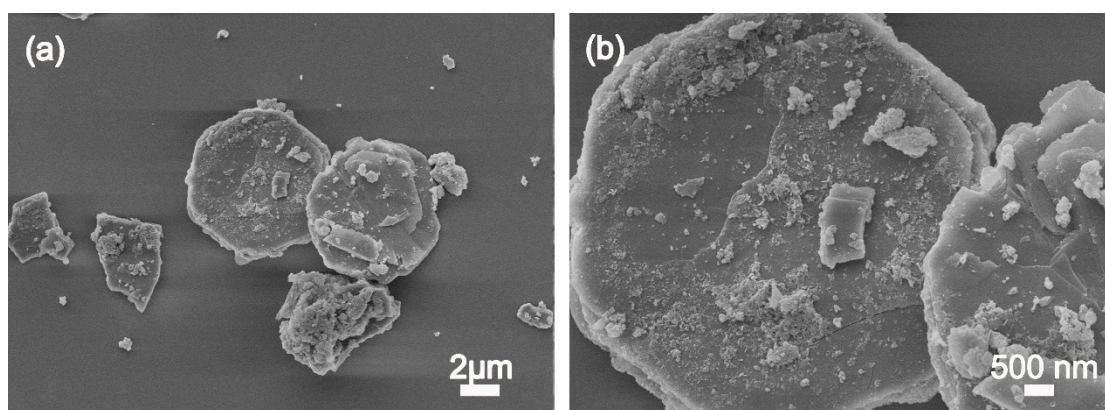

Fig. S2. Morphology characterizations of Co(OH)<sub>2</sub>

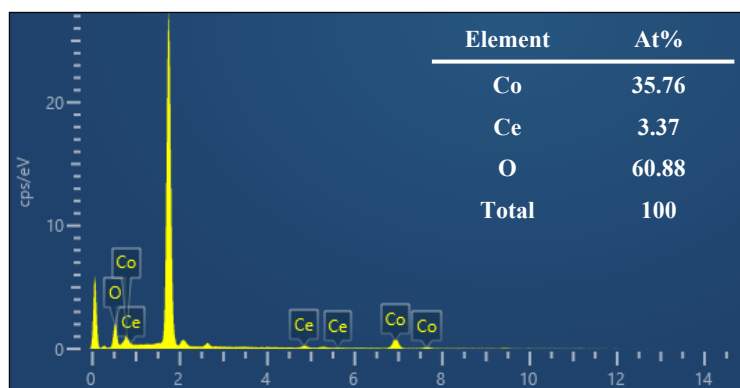

Fig. S3. Element distribution diagram

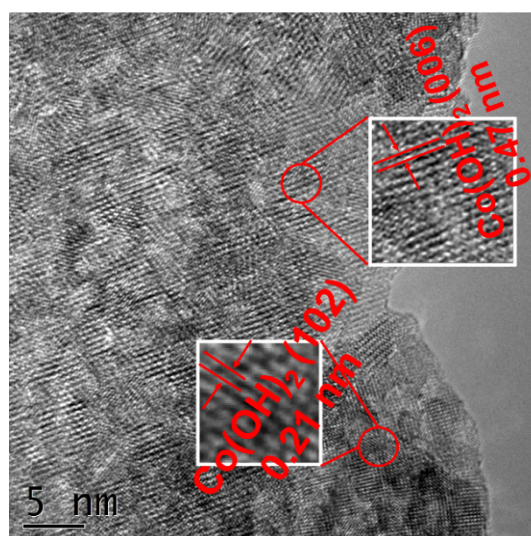

Fig. S4.  $\text{Co(OH)}_2$  of TEM images

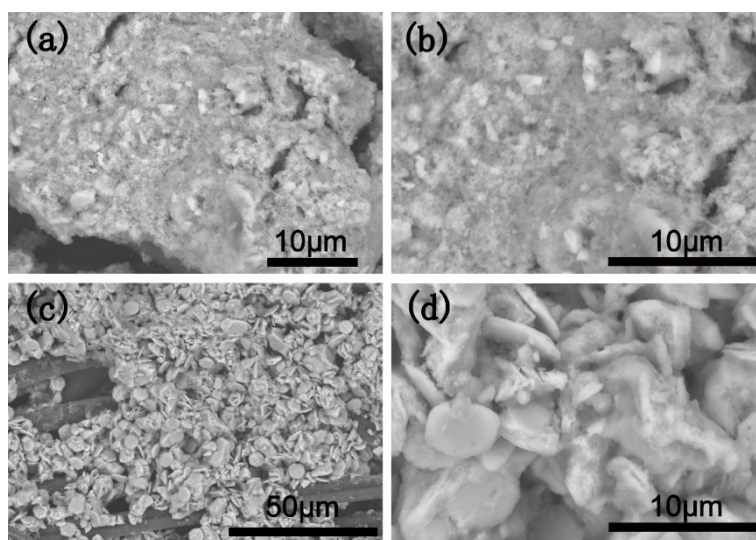

Fig. S5. SEM images of morphology characterizations of samples after accelerated stabilization; a, b)  $\text{Co(OH)}_2$ ; c,d) pH-9.5- $\text{CeO}_2/\text{Co(OH)}_2$ .

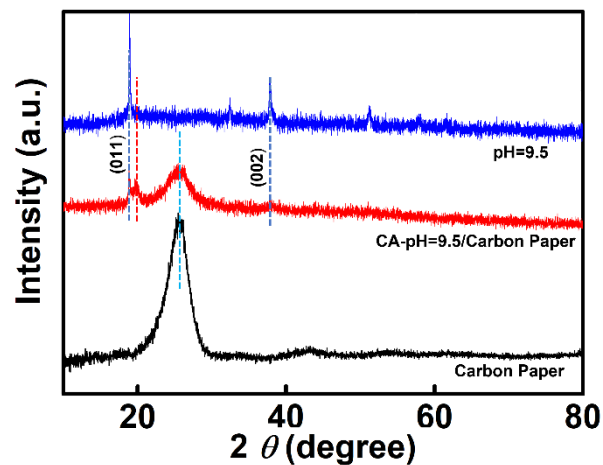

Fig. S6. XRD pattern of samples of 9.5-CeO<sub>2</sub>/Co(OH)<sub>2</sub>, after accelerated stabilization of 9.5-CeO<sub>2</sub>/Co(OH)<sub>2</sub> in carbon paper; and carbon paper.

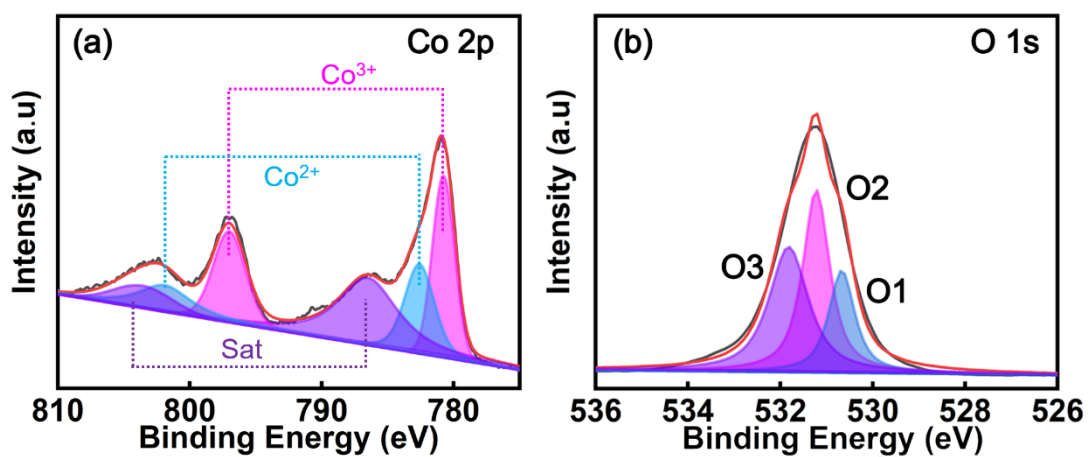

Fig. S7. XPS spectra of the Co(OH)<sub>2</sub> electrode. High-resolution XPS spectra of a) Co 2p, b) O 1s, respectively.

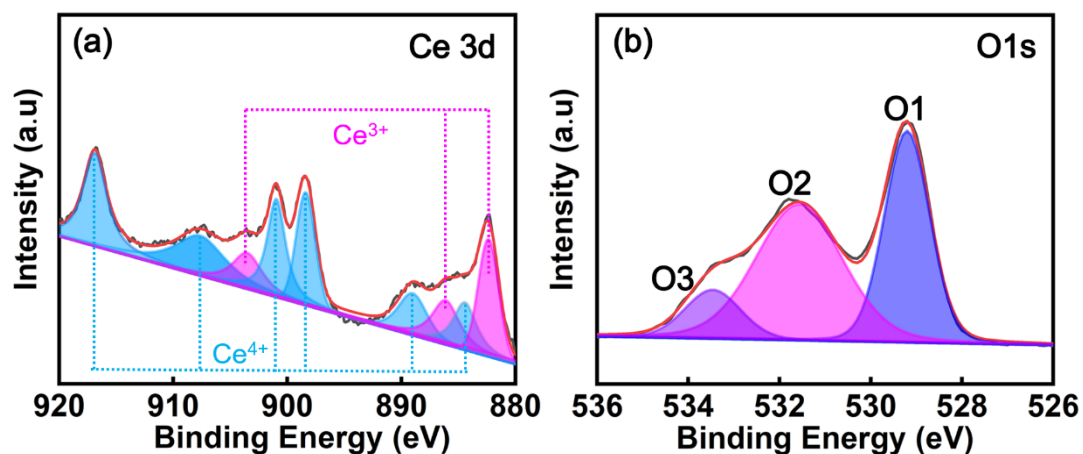

Fig. S8. XPS spectra of the CeO<sub>2</sub> electrode. High-resolution XPS spectra of a) Ce 3d, b) O 1s, respectively.

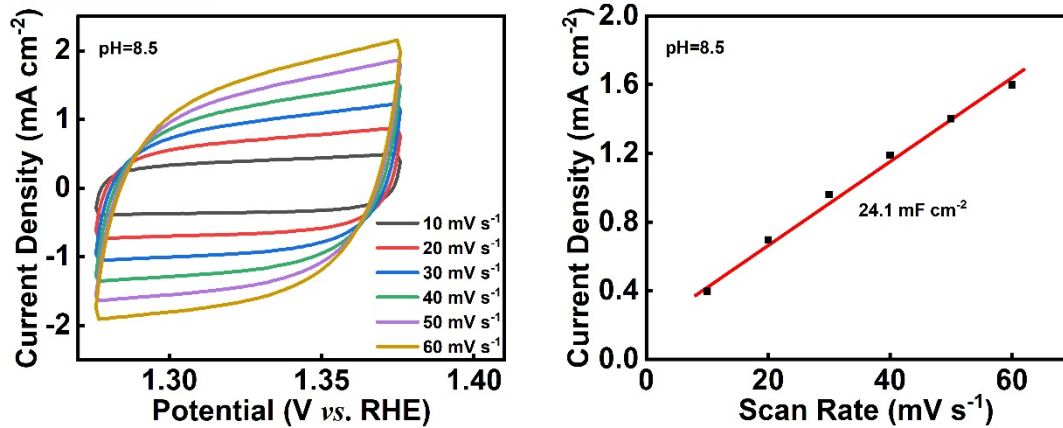

Fig. S9. Electrochemical double-layer capacitance measurements. CVs at different sweeping rates from  $10 \text{ mV s}^{-1}$  to  $60 \text{ mV s}^{-1}$  and Cdl value observed from CV plots at different scan rates of  $\text{CeO}_2\text{-Co(OH)}_2$ .

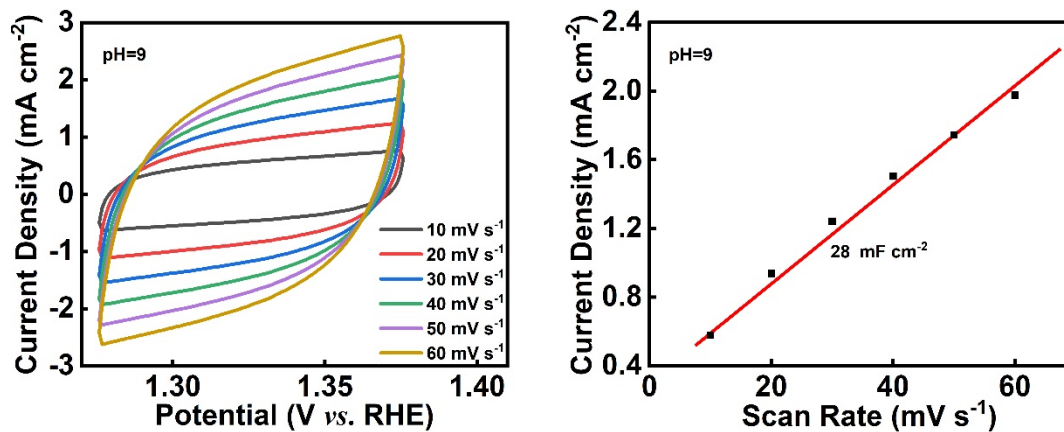

Fig. S10. Electrochemical double-layer capacitance measurements. CVs at different sweeping rates from  $10 \text{ mV s}^{-1}$  to  $60 \text{ mV s}^{-1}$  and Cdl value observed from CV plots at different scan rates of  $9\text{-CeO}_2\text{-Co(OH)}_2$ .

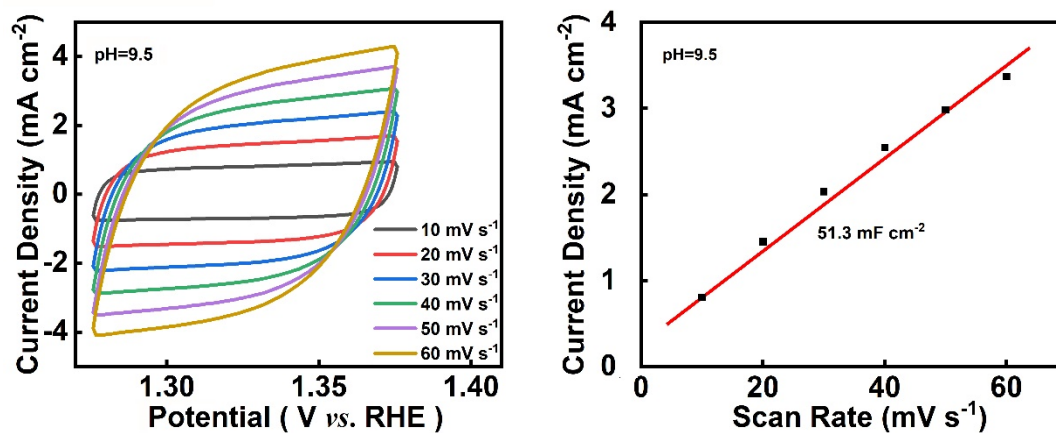

Fig. S11. Electrochemical double-layer capacitance measurements. CVs at different sweeping rates from  $10 \text{ mV s}^{-1}$  to  $60 \text{ mV s}^{-1}$  and Cdl value observed from CV plots at different scan rates of  $9\text{-CeO}_2\text{-Co(OH)}_2$ .

9.5-CeO<sub>2</sub>-Co(OH)<sub>2</sub>

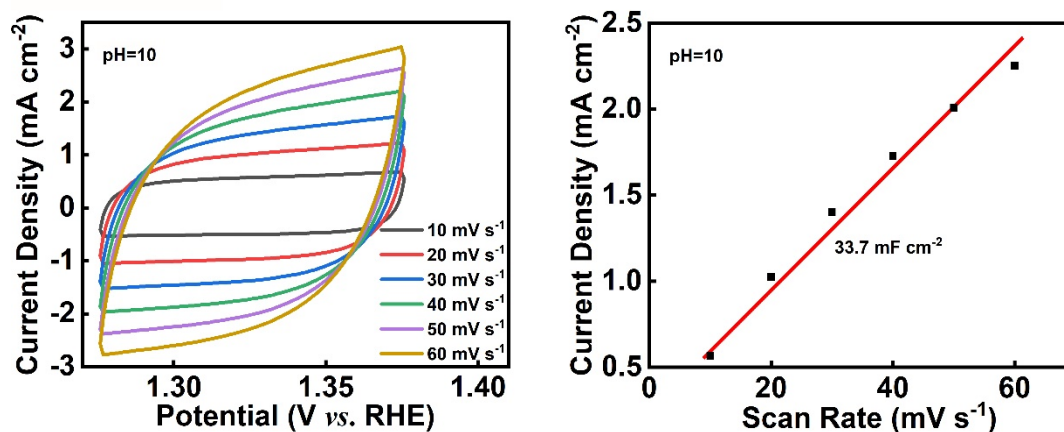

Fig. S12. Electrochemical double-layer capacitance measurements. CVs at different sweeping rates from 10 mV s<sup>-1</sup> to 60 mV s<sup>-1</sup> and C<sub>dl</sub> value observed from CV plots at different scan rates of 10-CeO<sub>2</sub>-Co(OH)<sub>2</sub>.

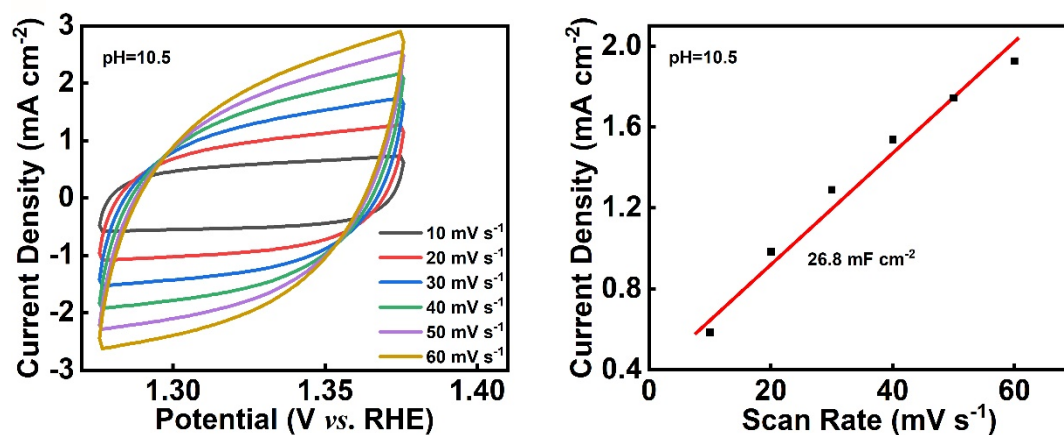

Fig. S13. Electrochemical double-layer capacitance measurements. CVs at different sweeping rates from 10 mV s<sup>-1</sup> to 60 mV s<sup>-1</sup> and C<sub>dl</sub> value observed from CV plots at different scan rates of 10.5-CeO<sub>2</sub>-Co(OH)<sub>2</sub>.

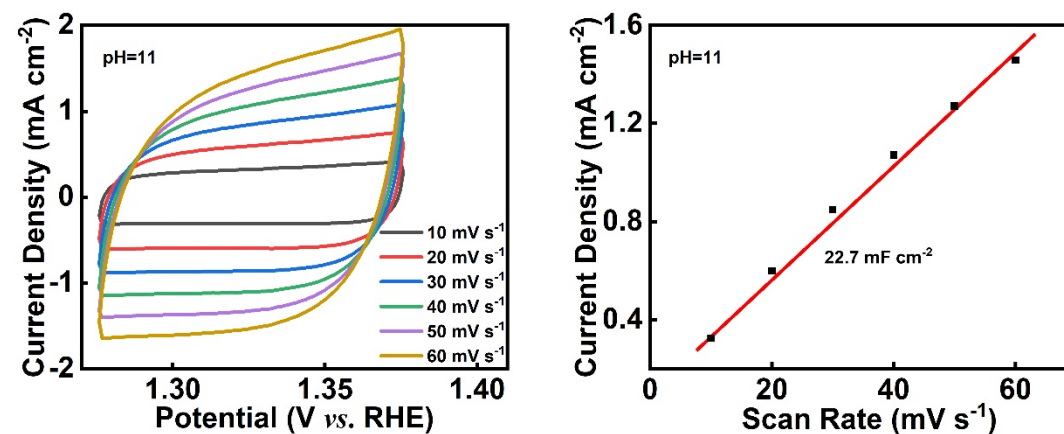

Fig. S14. Electrochemical double-layer capacitance measurements. CVs at different sweeping

rates from  $10 \text{ mV s}^{-1}$  to  $60 \text{ mV s}^{-1}$  and Cdl value observed from CV plots at different scan rates of  $11\text{-CeO}_2\text{-Co(OH)}_2$ .

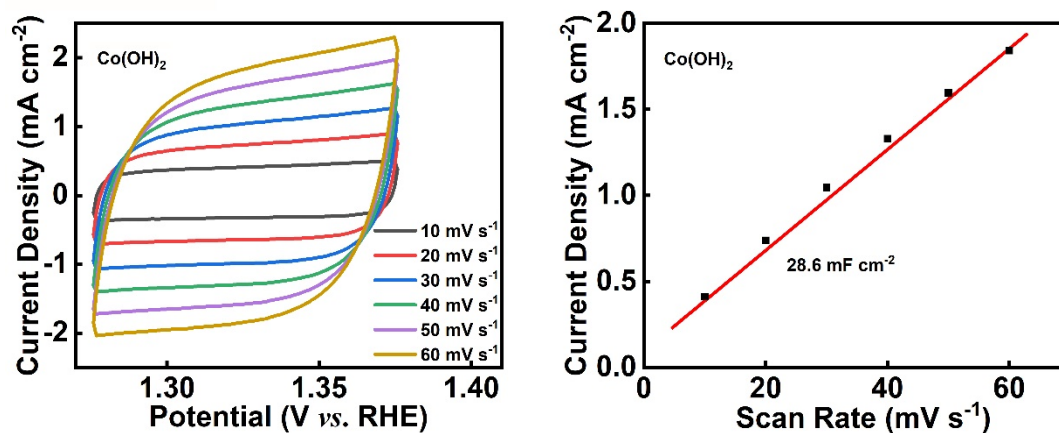

Fig. S15. Electrochemical double-layer capacitance measurements. CVs at different sweeping rates from  $10 \text{ mV s}^{-1}$  to  $60 \text{ mV s}^{-1}$  and Cdl value observed from CV plots at different scan rates of  $\text{Co(OH)}_2$ .

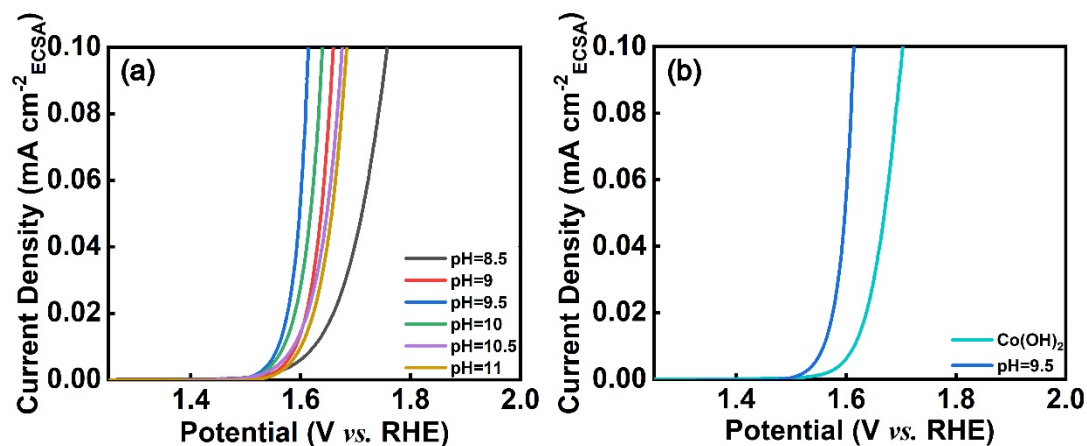

Fig. S16. ECSA-normalized LSV curves a) samples prepared from solutions of different pH values of  $\text{CeO}_2\text{-Co(OH)}_2$ ; b) LSV curves of optimized by controlling solution pH value of  $9.5\text{-CeO}_2\text{-Co(OH)}_2$  and  $\text{Co(OH)}_2$ .
